# Supplementary material for: Microwave-assisted synthesis of green fluorescent copper nanoclusters: a novel approach for sensing of hydroxyl radicals and pyrophosphate ions via a “turn-off–on” mechanism
Source: Royal Society of Chemistry journal article supplement (doi:10.1039/d3nj03751g), 2023-01-01
Supplement: d3nj03751g1.pdf [file d3nj03751g1.pdf]

## Supporting Information of

### **Microwave assisted synthesis of green fluorescent copper nanoclusters: A novel approach for sensing of hydroxyl radical and pyrophosphate ion via “turn-off-on” mechanism**

**Harshita<sup>a</sup>, Tae Jung Park<sup>b</sup> and Suresh Kumar Kailasa<sup>a\*</sup>**

*<sup>a</sup>Department of Chemistry, Sardar Vallabhbhai National Institute of Technology, Surat- 395 007, India*

*<sup>b</sup>Department of Chemistry, Research Institute of Chem-Bio Diagnostic Technology, Chung-Ang University, 84 Heukseok-ro, Dongjak-gu, Seoul 06974, Republic of Korea*

*\* Corresponding author, E-mail: [sureshkumarchem@gmail.com](mailto:sureshkumarchem@gmail.com); [skk@chem.svnit.ac.in](mailto:skk@chem.svnit.ac.in)*

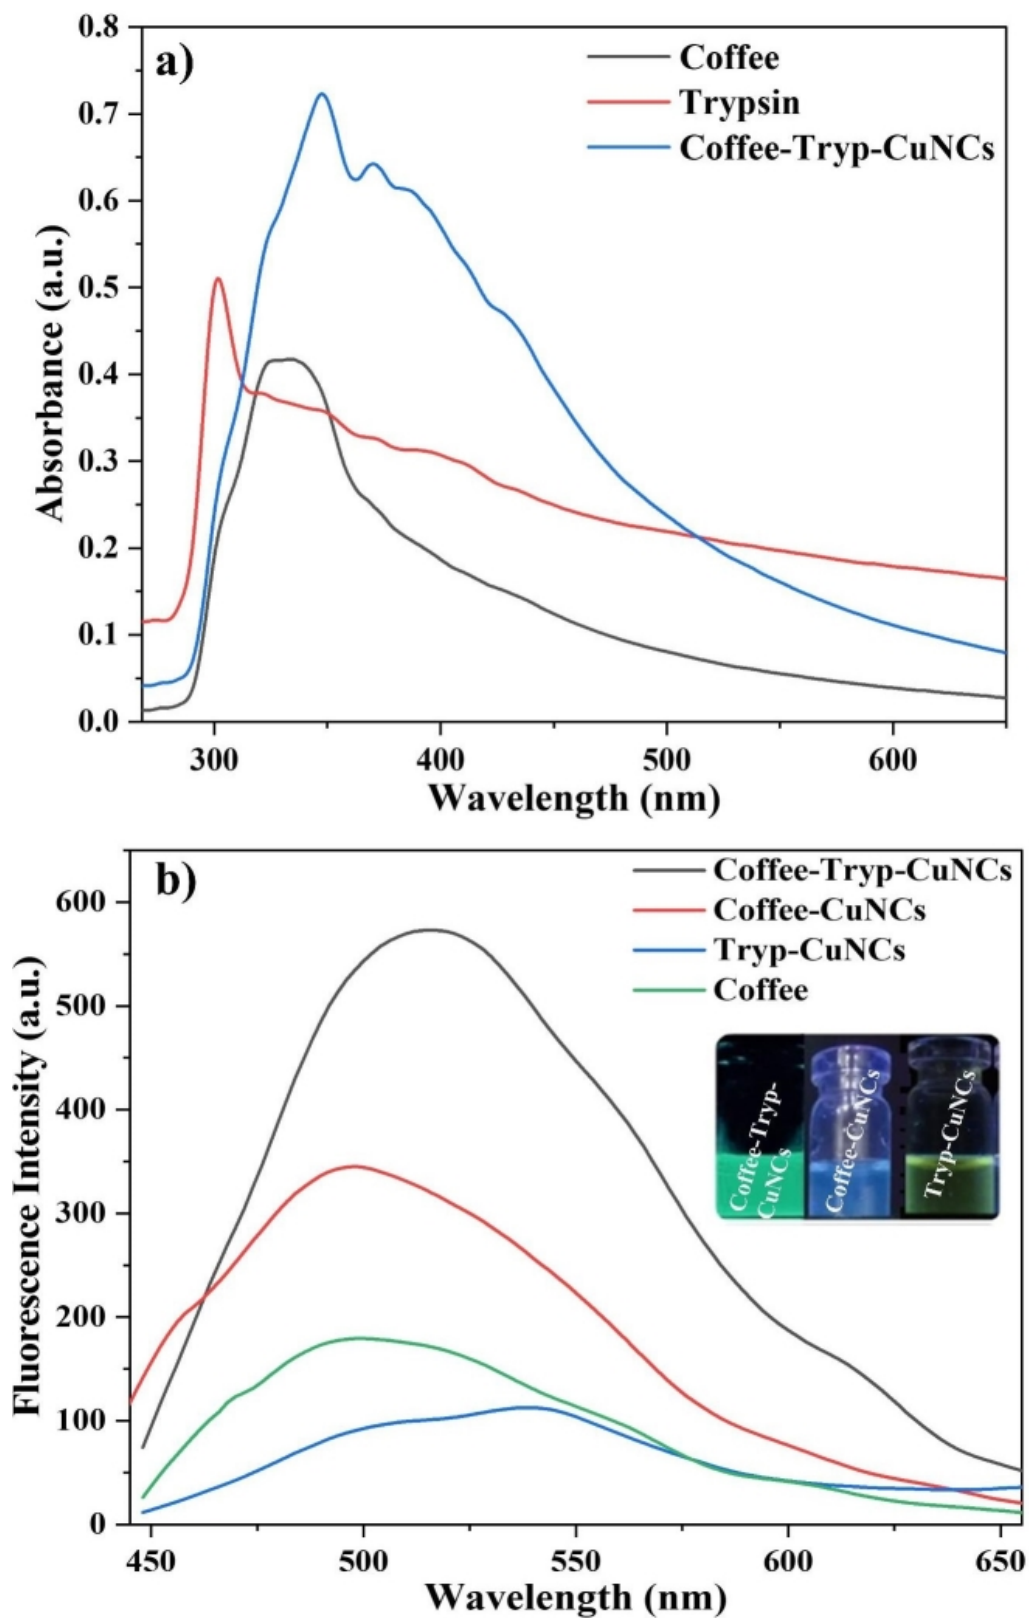

**Figure S1** (a) Absorption spectra of coffee, trypsin, Coffee-Tryp-CuNCs, (b) Fluorescence emission spectra of Coffee-Tryp-CuNCs, Coffee-CuNCs, Tryp-CuNCs, coffee.

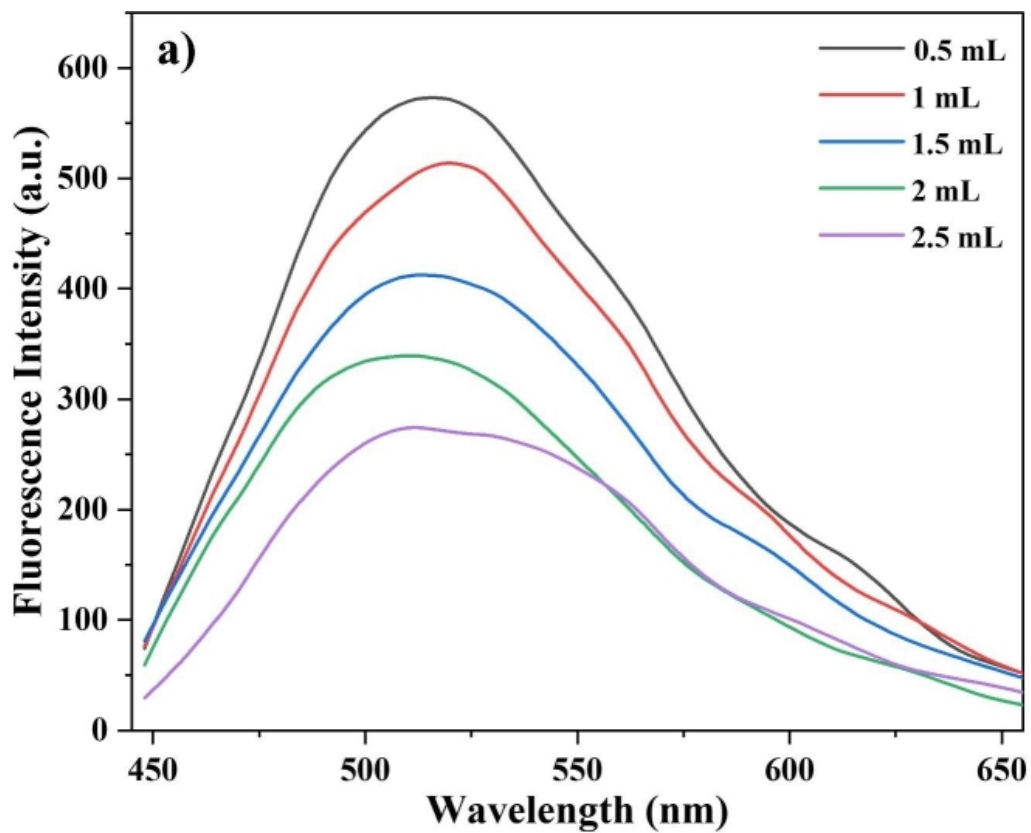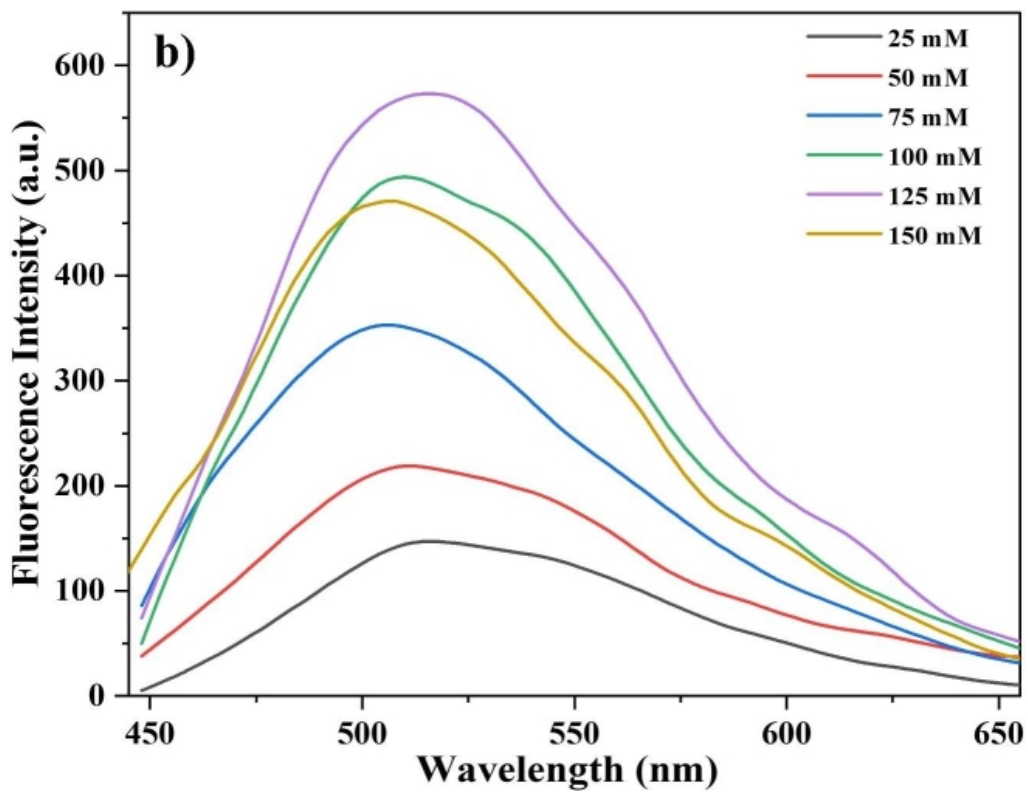

**Figure S2** Emission spectra of Coffee-Tryp-CuNCs at different (a) volumes of coffee bean extract (0.5 mL-2.5mL), (b) concentrations of trypsin (25 mM-150 mM).

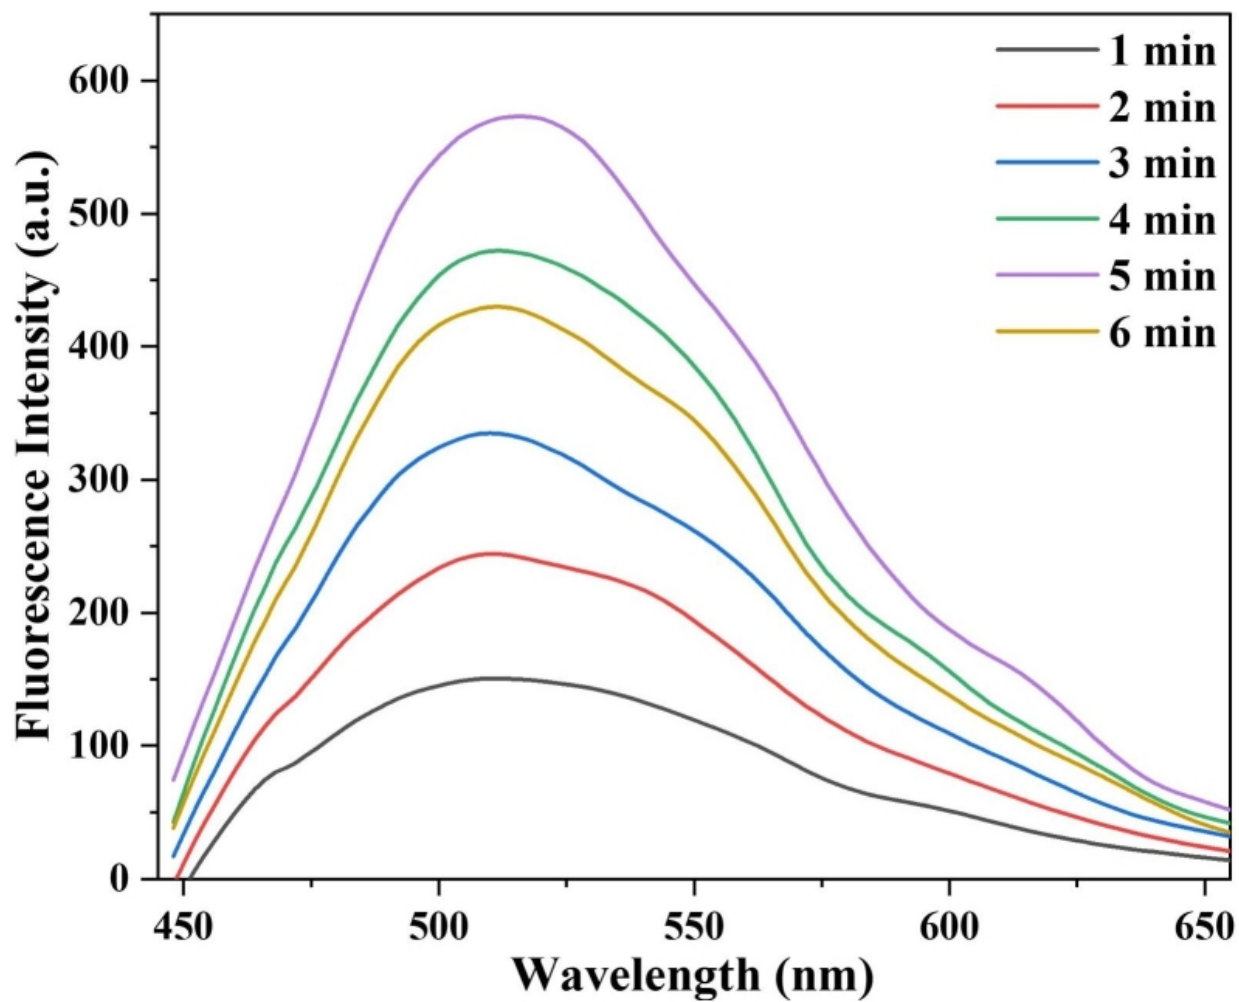

**Figure S3** Fluorescence spectra of Coffee-Tryp-CuNCs at various reaction times (1 min-6 min).

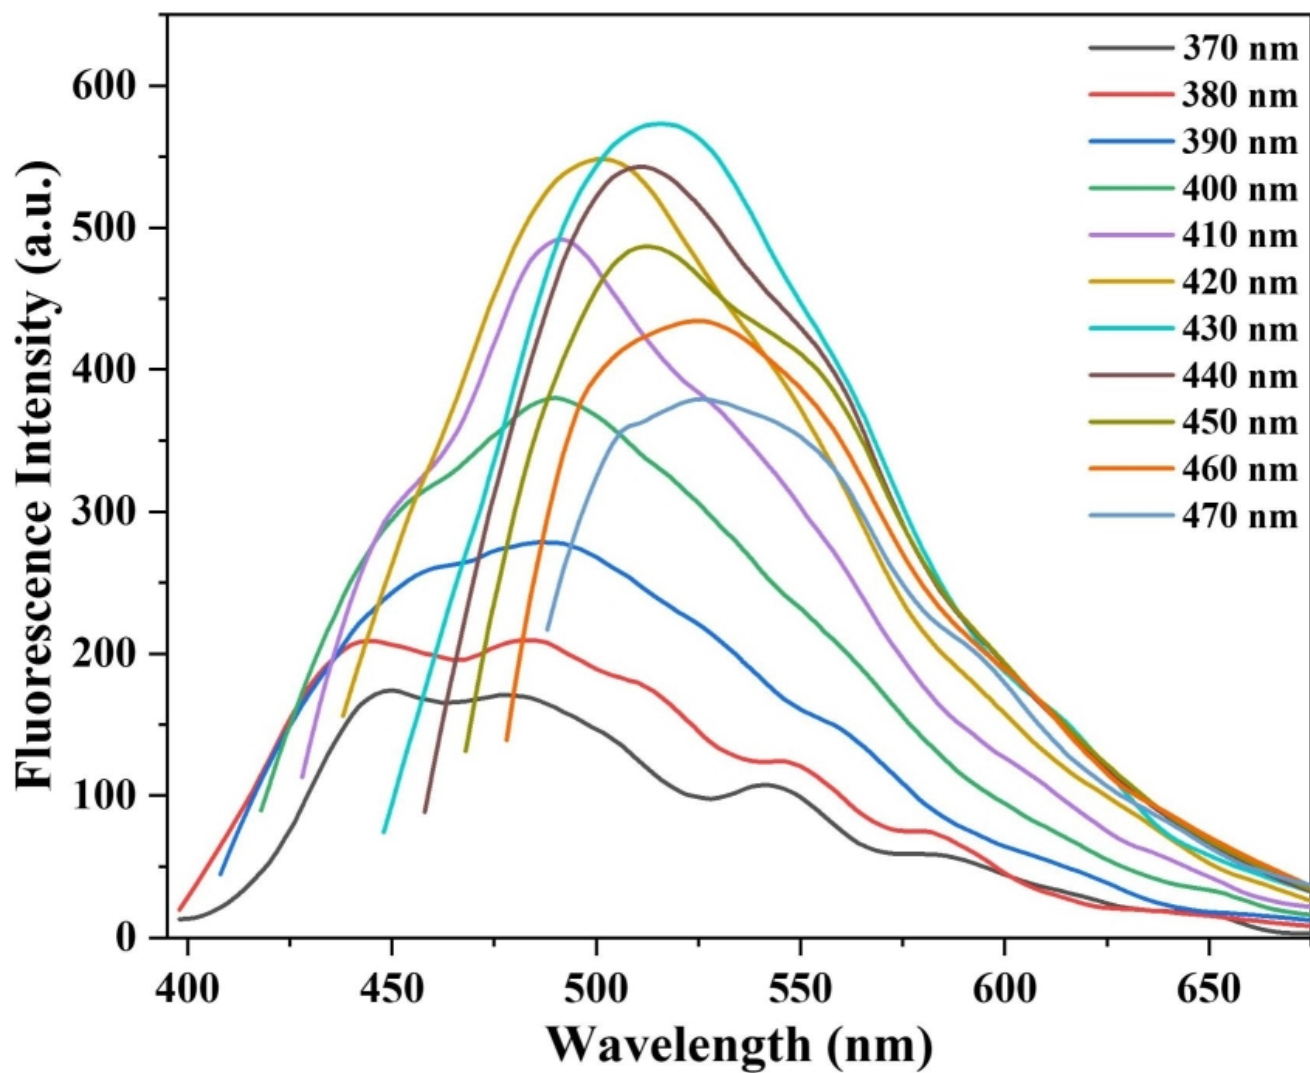

**Figure S4** Excitation dependent emission spectra of Coffee-Tryp-CuNCs at different excitation wavelengths from 370-470 nm.

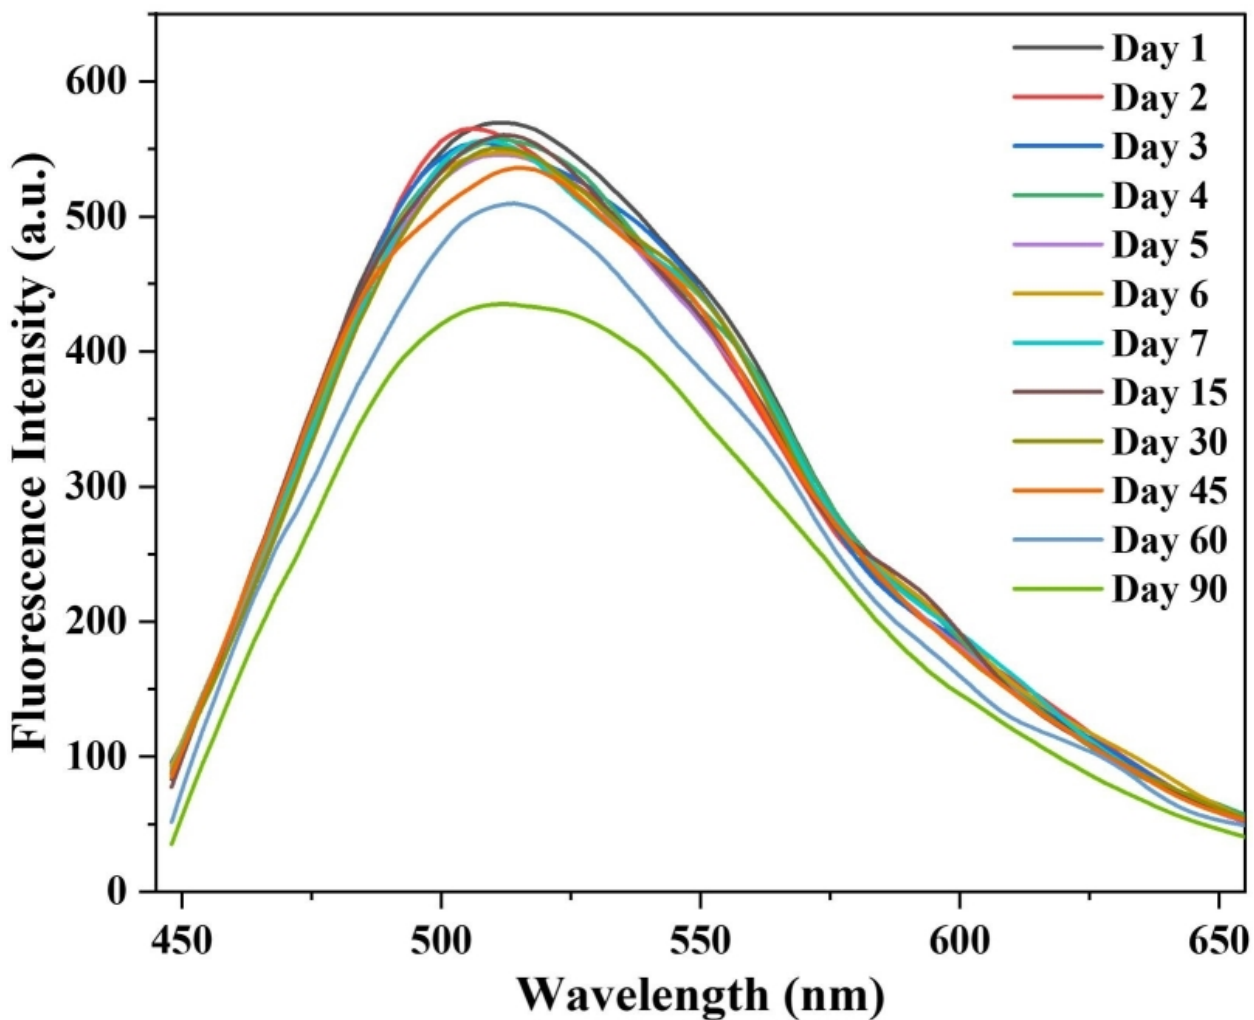

**Figure S5** Evaluation of Coffee-Tryp-CuNCs stability from day 1 to day 90.

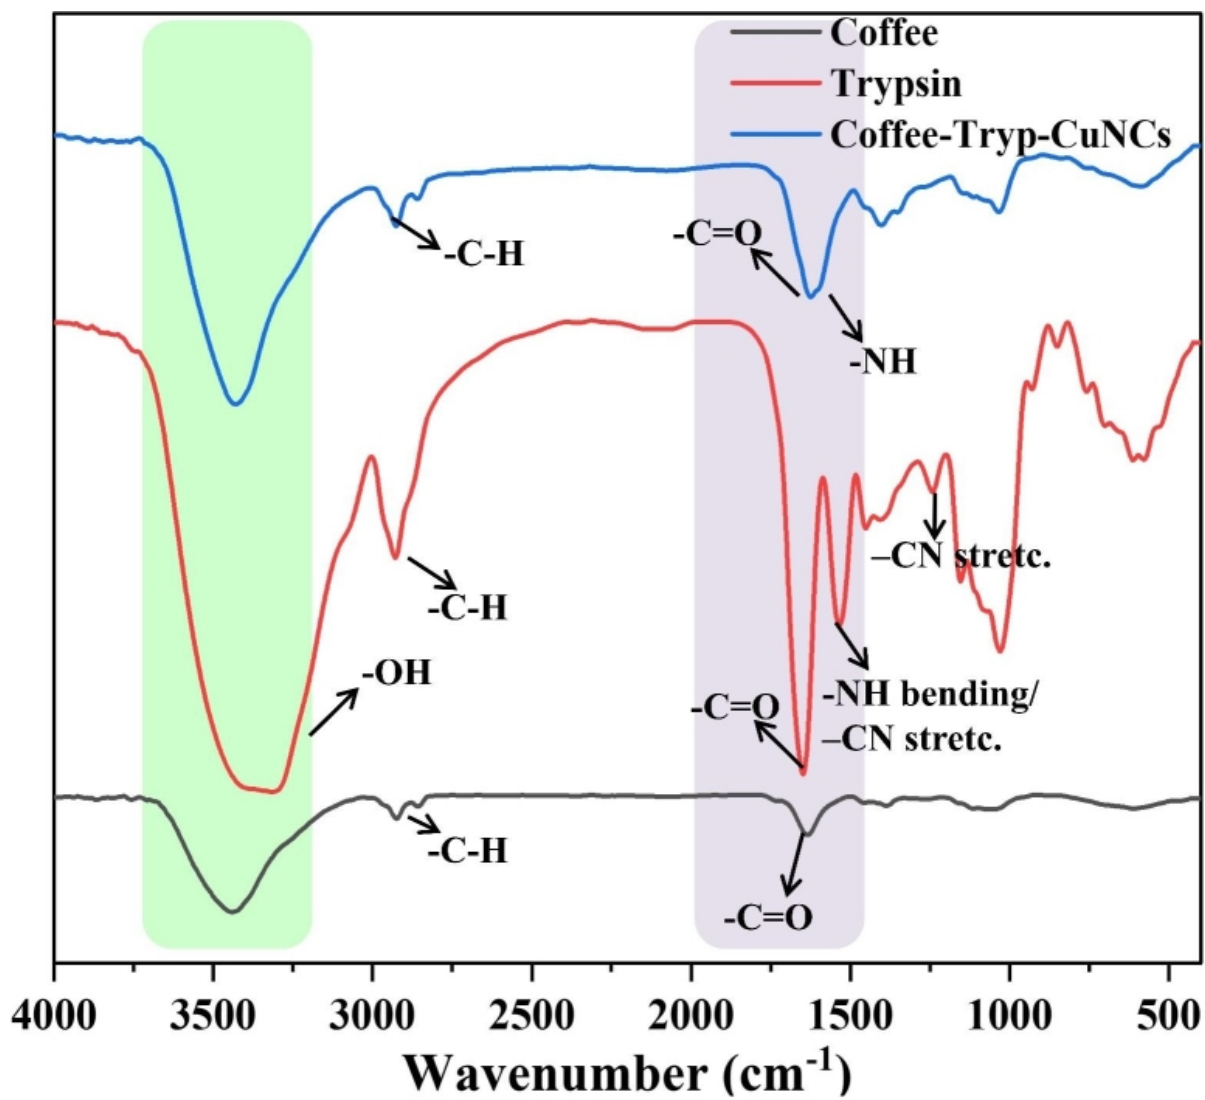

**Figure S6** FT-IR analysis of coffee, trypsin and Coffee-Tryp-CuNCs.



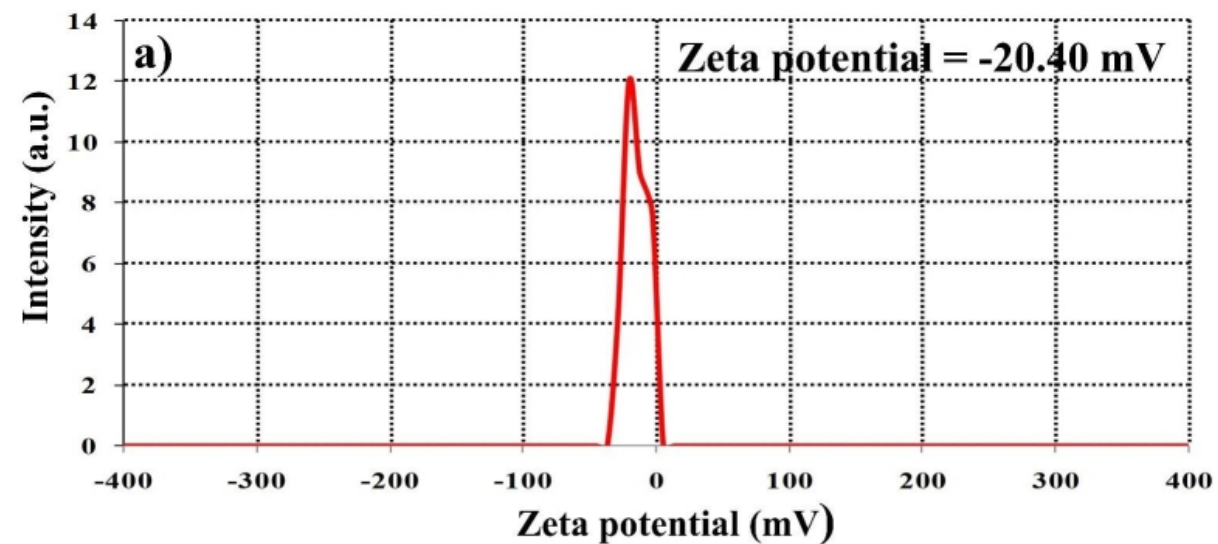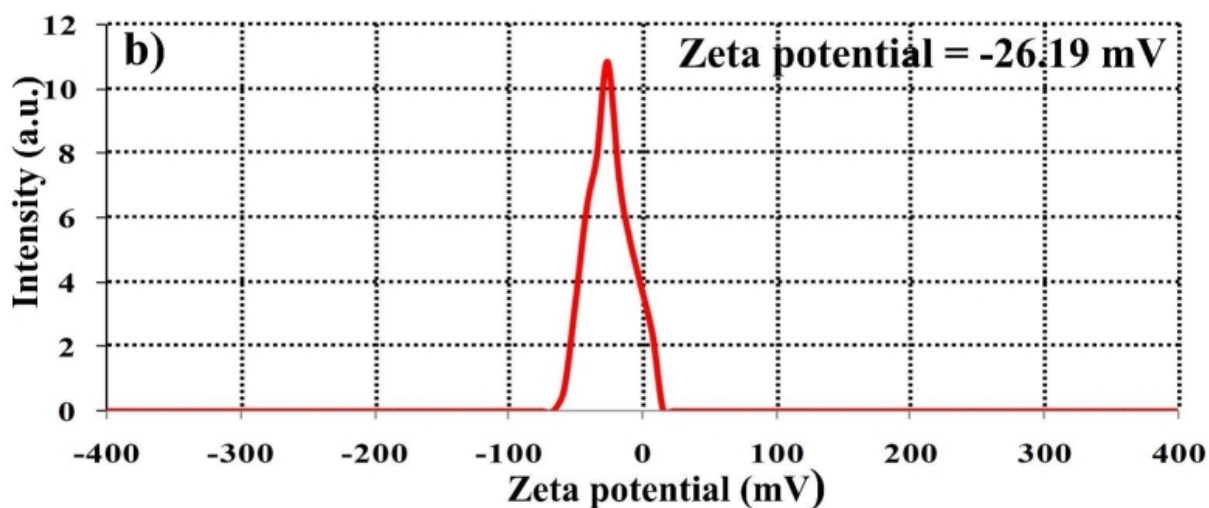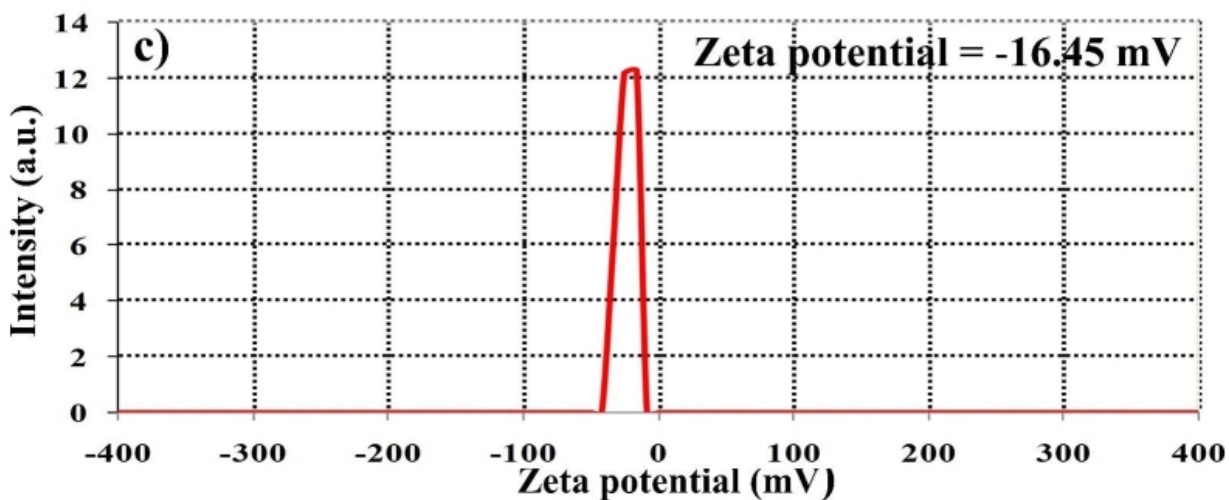

**Figure S7** Zeta potential of a) Coffee-Tryp-CuNCs b) Coffee-Tryp-CuNCs-OH and c) Coffee-Tryp-CuNCs-OH with PPI.



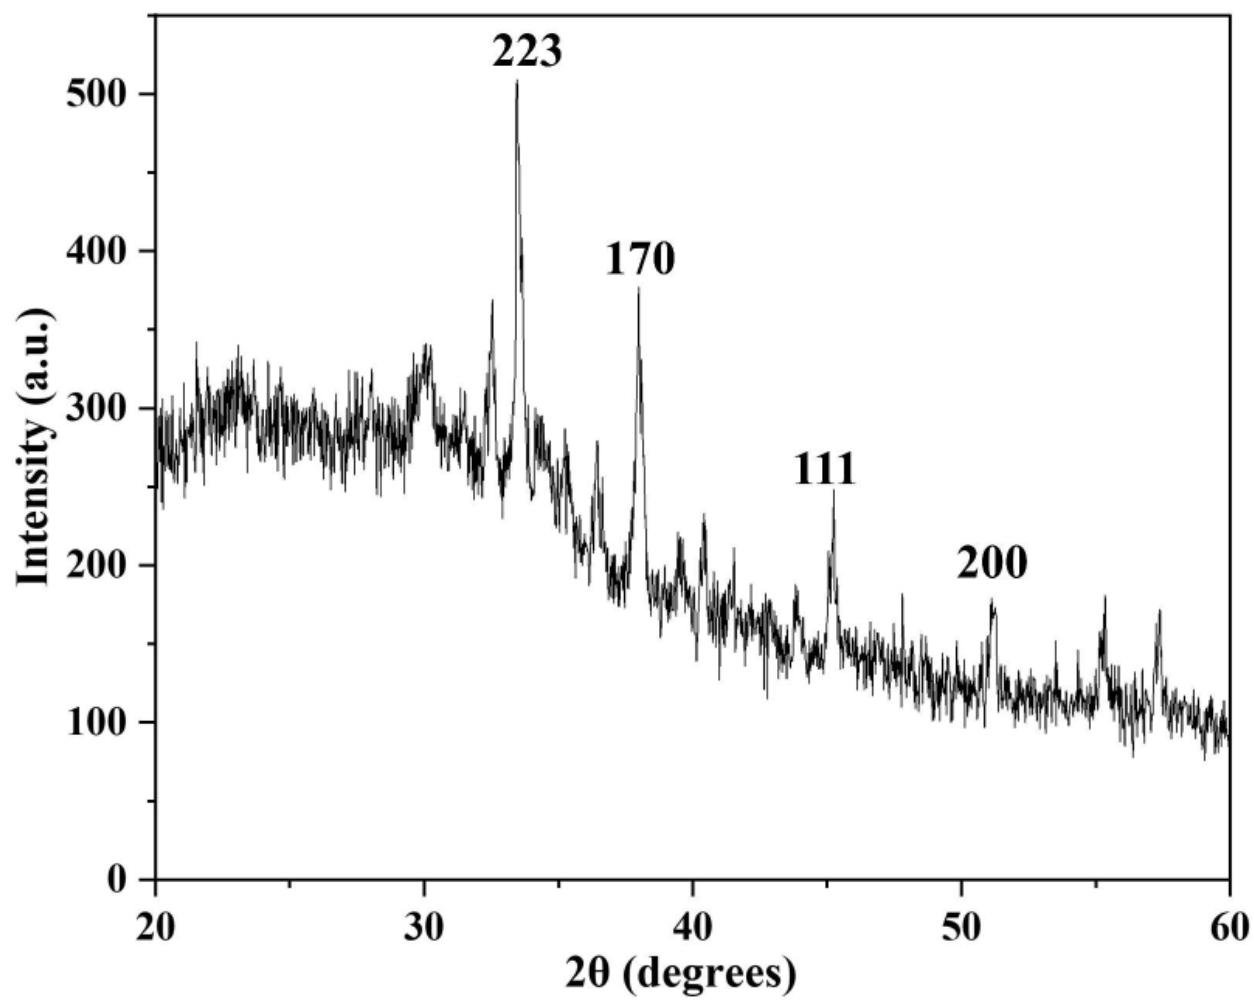

**Figure S8** XRD pattern of Coffee-Tryp-CuNCs.

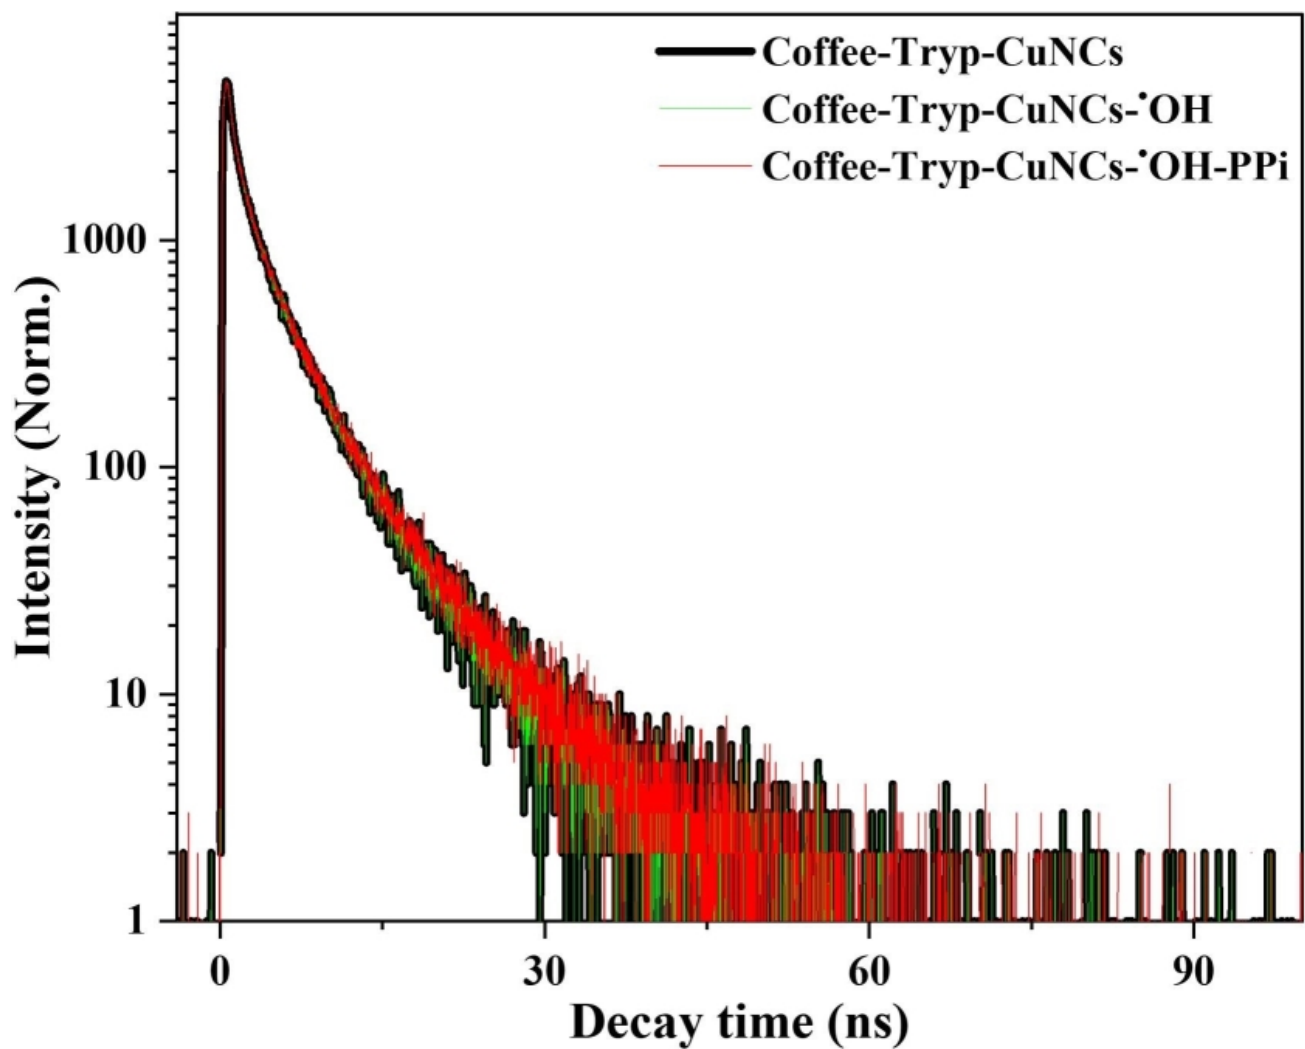

**Figure S9** Fluorescence lifetime analysis of Coffee-Tryp-CuNCs, Coffee-Tryp-CuNCs- $\cdot$ OH and Coffee-Tryp-CuNCs- $\cdot$ OH with PPI.

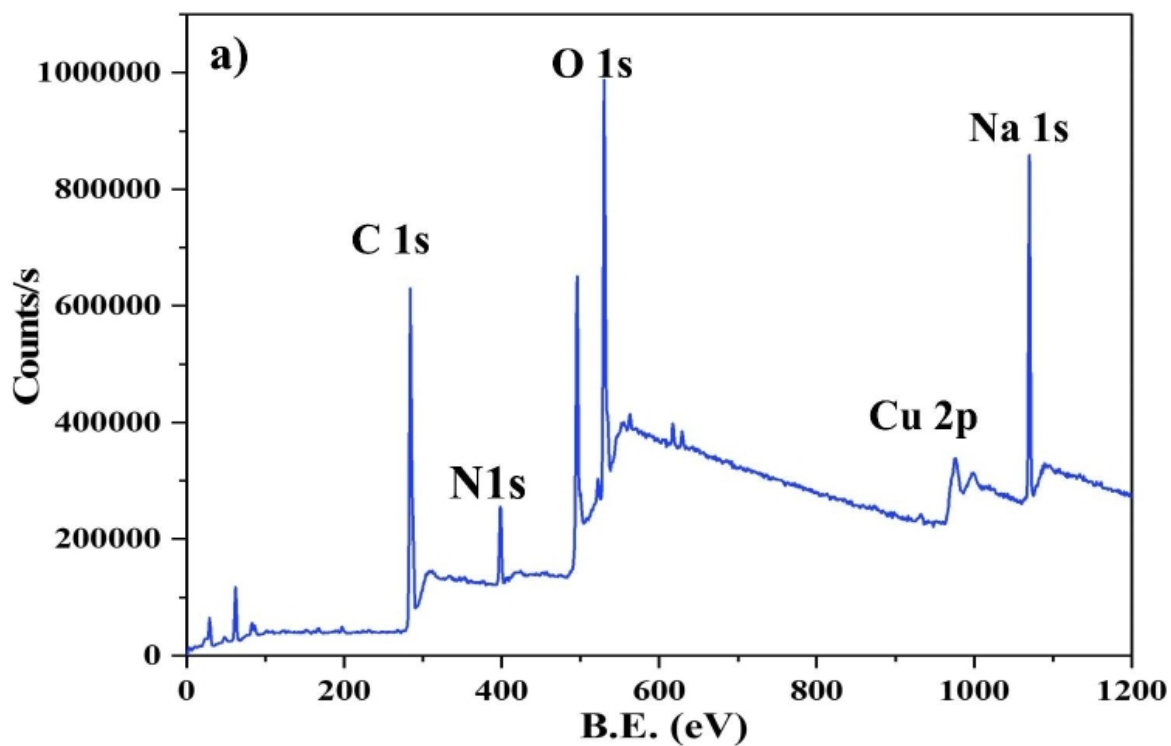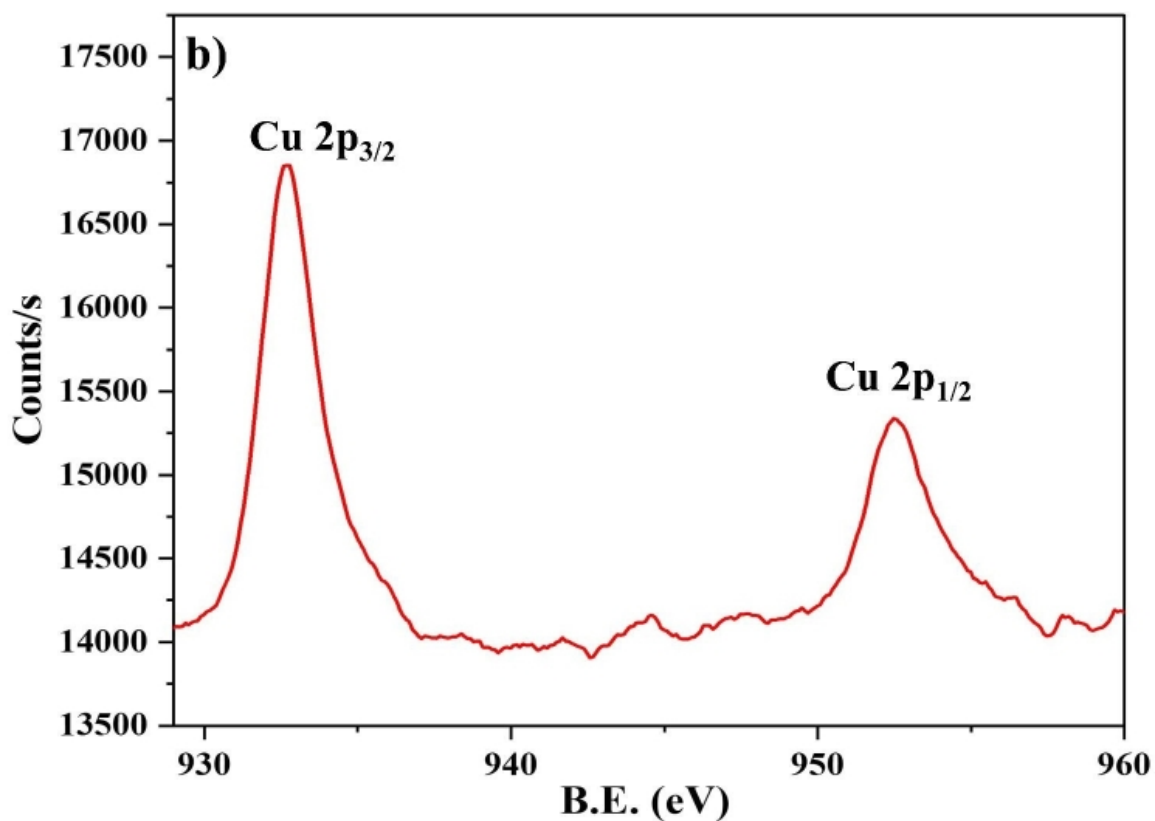

**Figure S10** (a) XPS survey spectra of Coffee-Tryp-CuNCs and (b) XPS fitting spectra of Cu 2p showing two oxidation states of Cu in Coffee-Tryp-CuNCs.

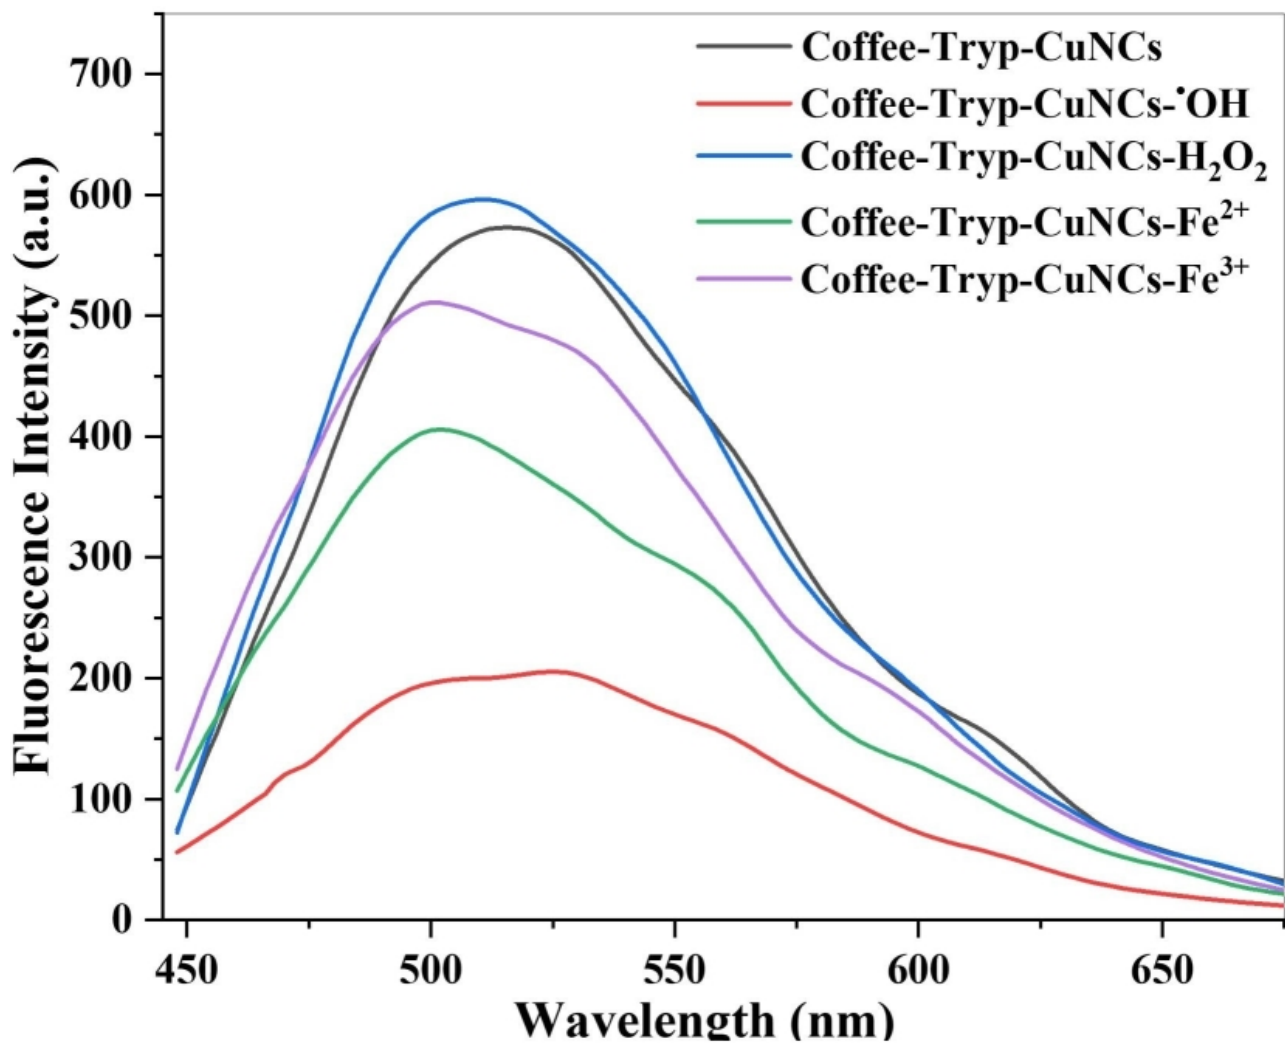

**Figure S11** Investigating the emission spectra of Coffee-Tryp-CuNCs with  $\cdot\text{OH}$ ,  $\text{H}_2\text{O}_2$ ,  $\text{Fe}^{2+}$ , and  $\text{Fe}^{3+}$ .

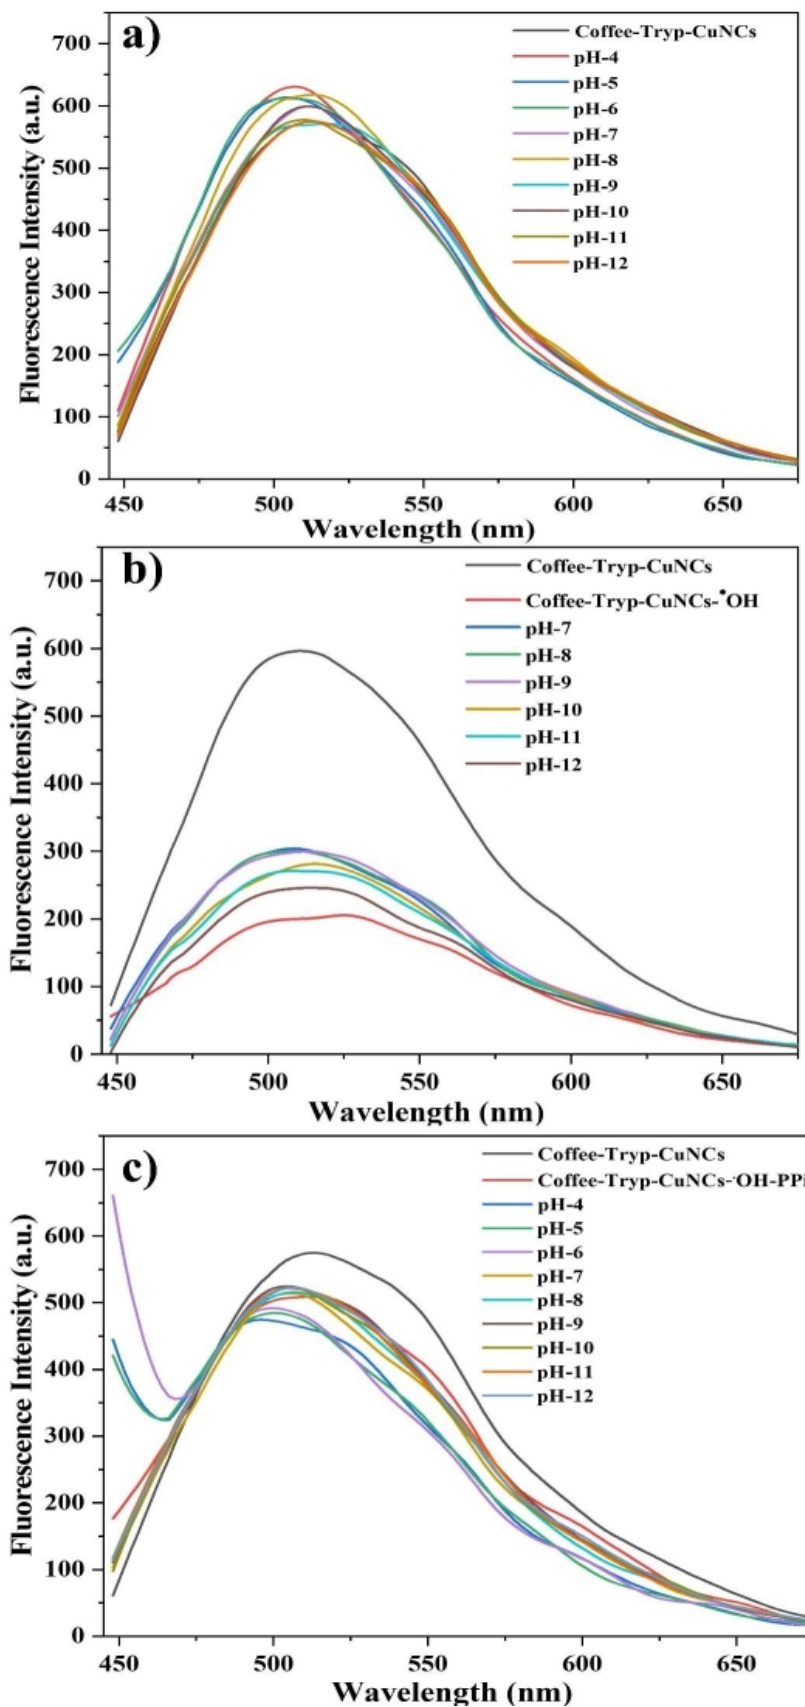

**Figure S12** (a) PBS pH (4.0 to 12.0) effect on fluorescence spectra of Coffee-Tryp-CuNCs b) Coffee-Tryp-CuNCs- $\cdot$ OH and c) Coffee-Tryp-CuNCs- $\cdot$ OH with PPI.

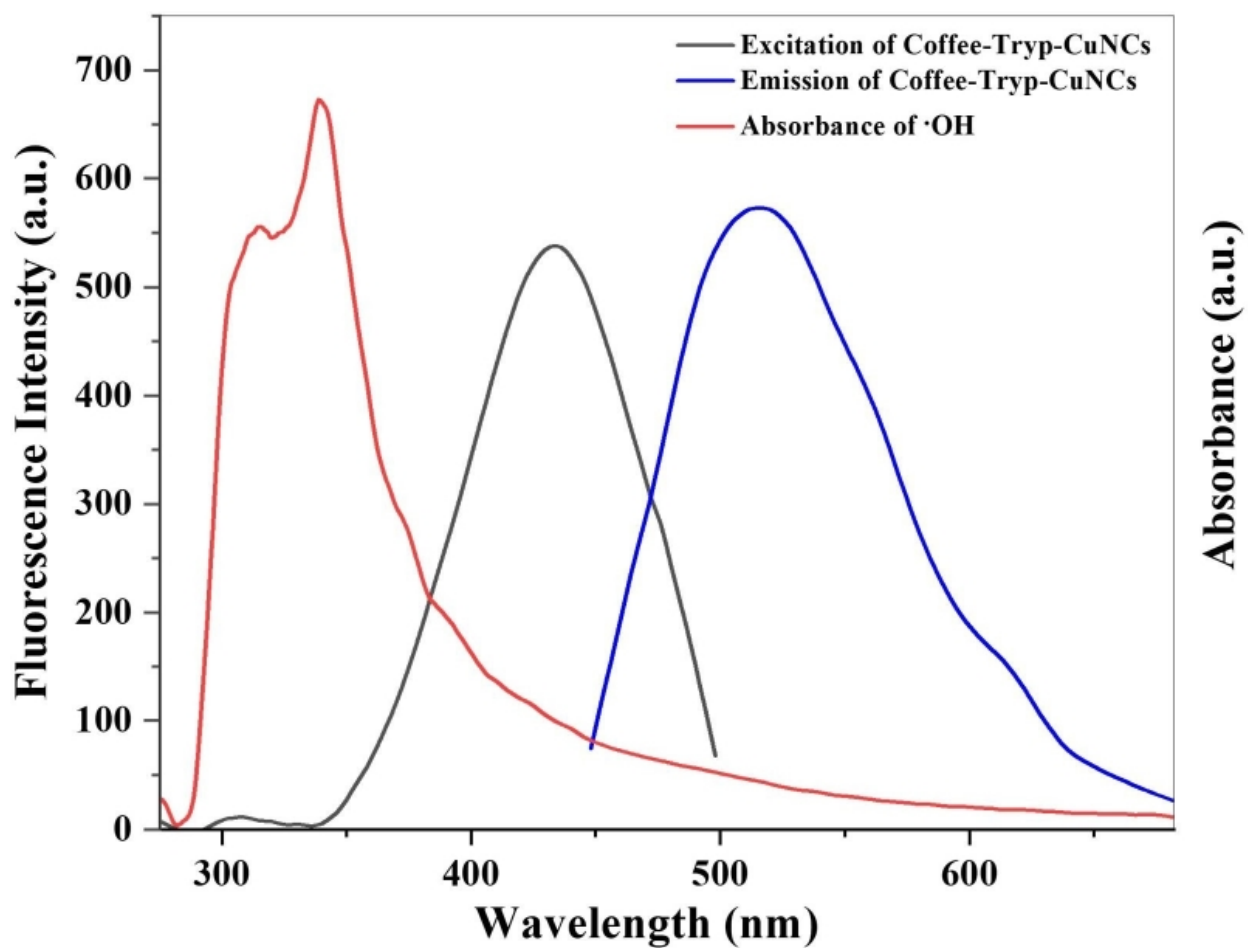

**Figure S13** Fluorescence excitation and emission spectra of Coffee-Tryp-CuNCs and absorbance spectra of  $\cdot\text{OH}$ .

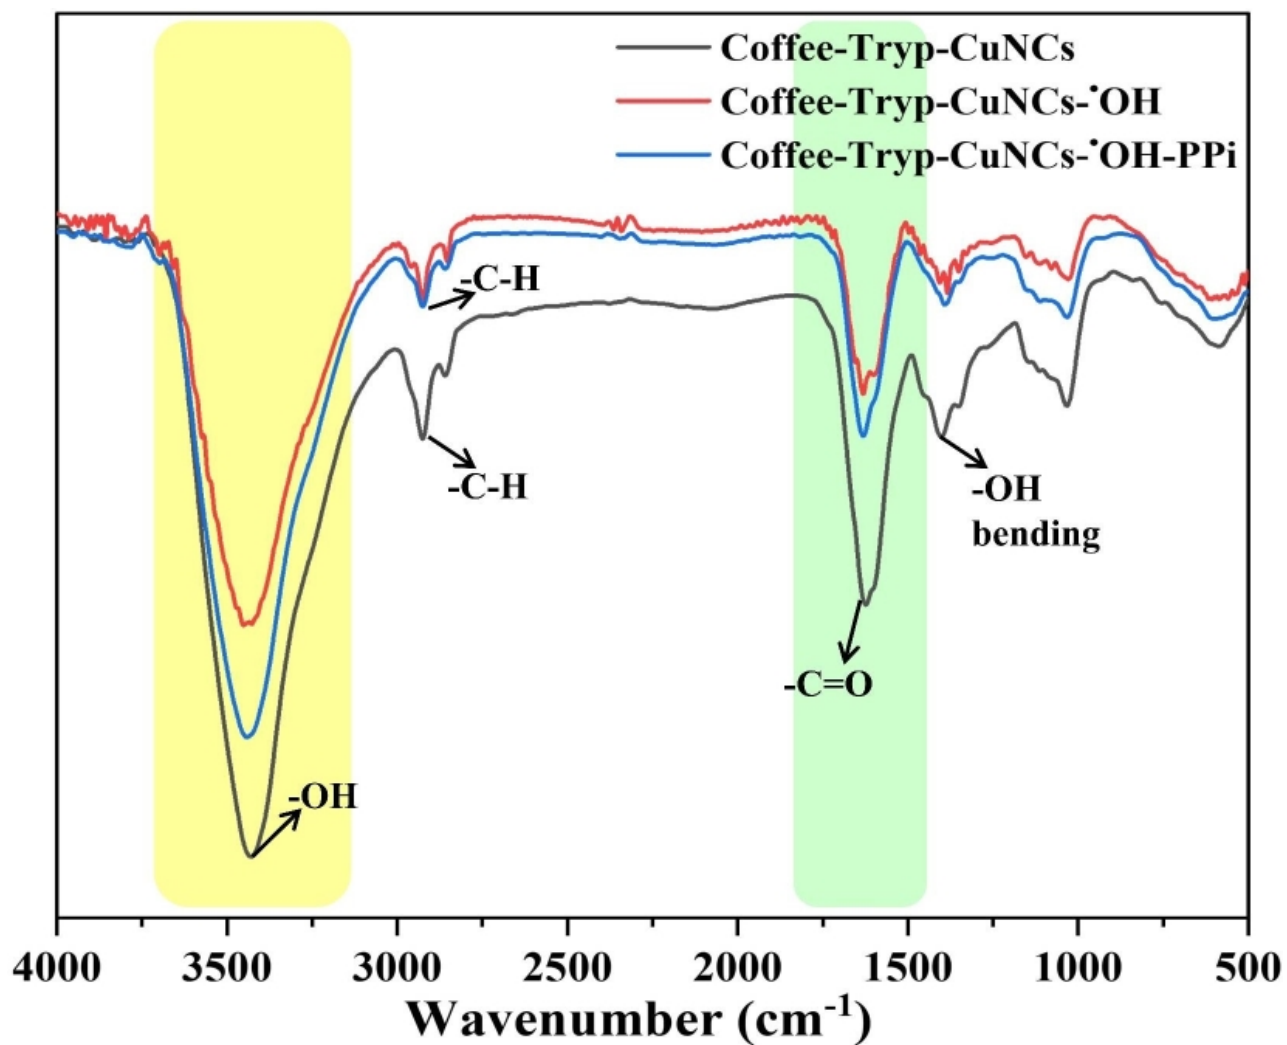

**Figure S14** FT-IR characterization of Coffee-Tryp-CuNCs, Coffee-Tryp-CuNCs-OH and Coffee-Tryp-CuNCs-OH with PPI.



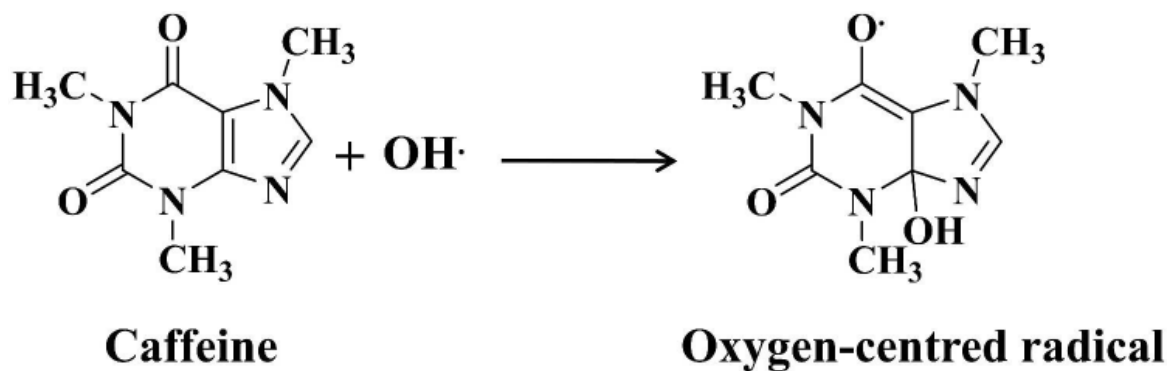

**Figure S15** Structural changes occurring to Coffee-Tryp-CuNCs surface after adding  $\cdot\text{OH}$ .

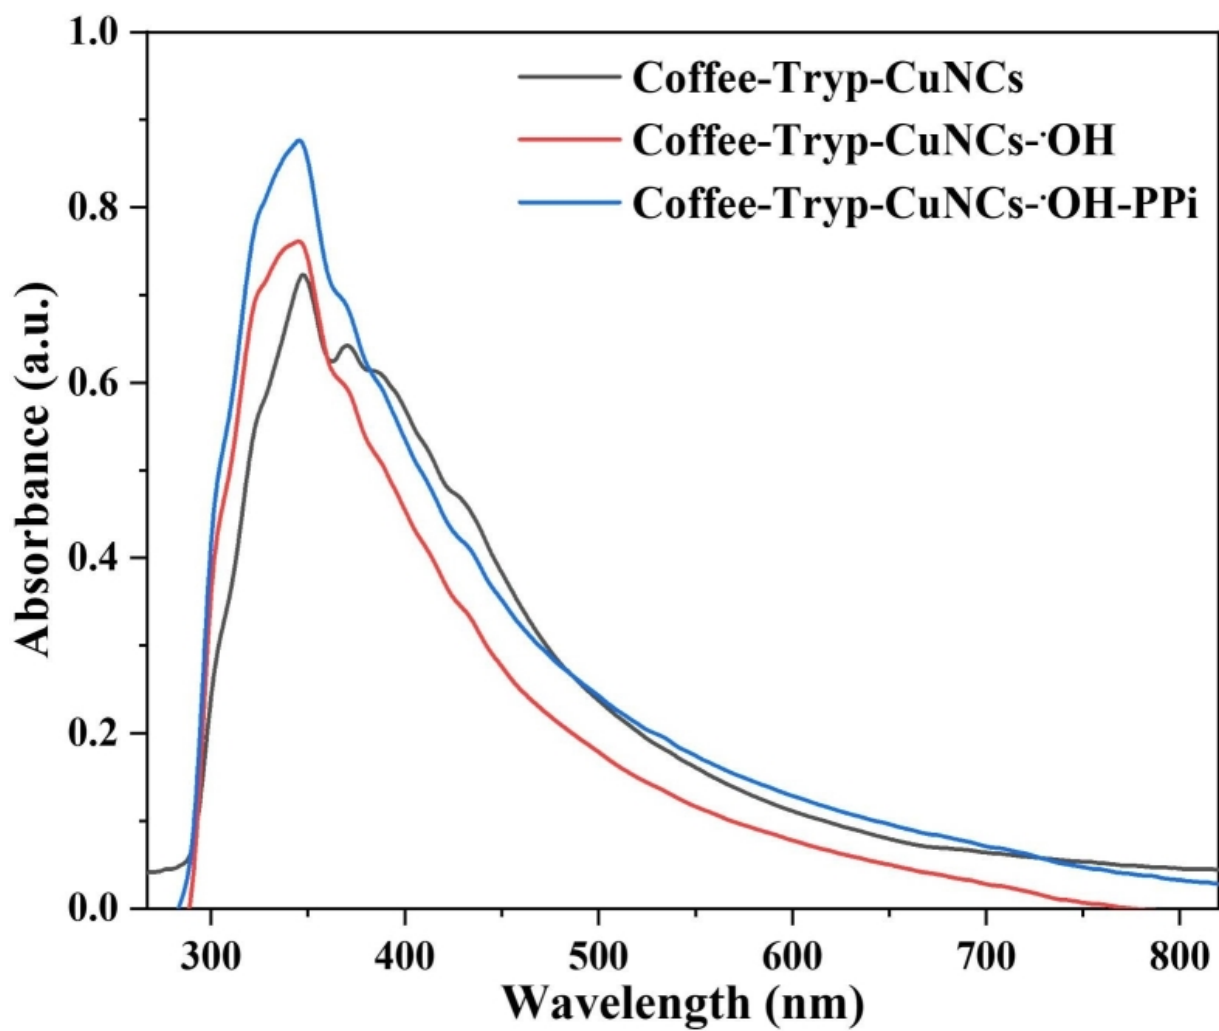

**Figure S16** Absorbance spectrum of Coffee-Tryp-CuNCs, Coffee-Tryp-CuNCs·OH and Coffee-Tryp-CuNCs·OH with PPI.

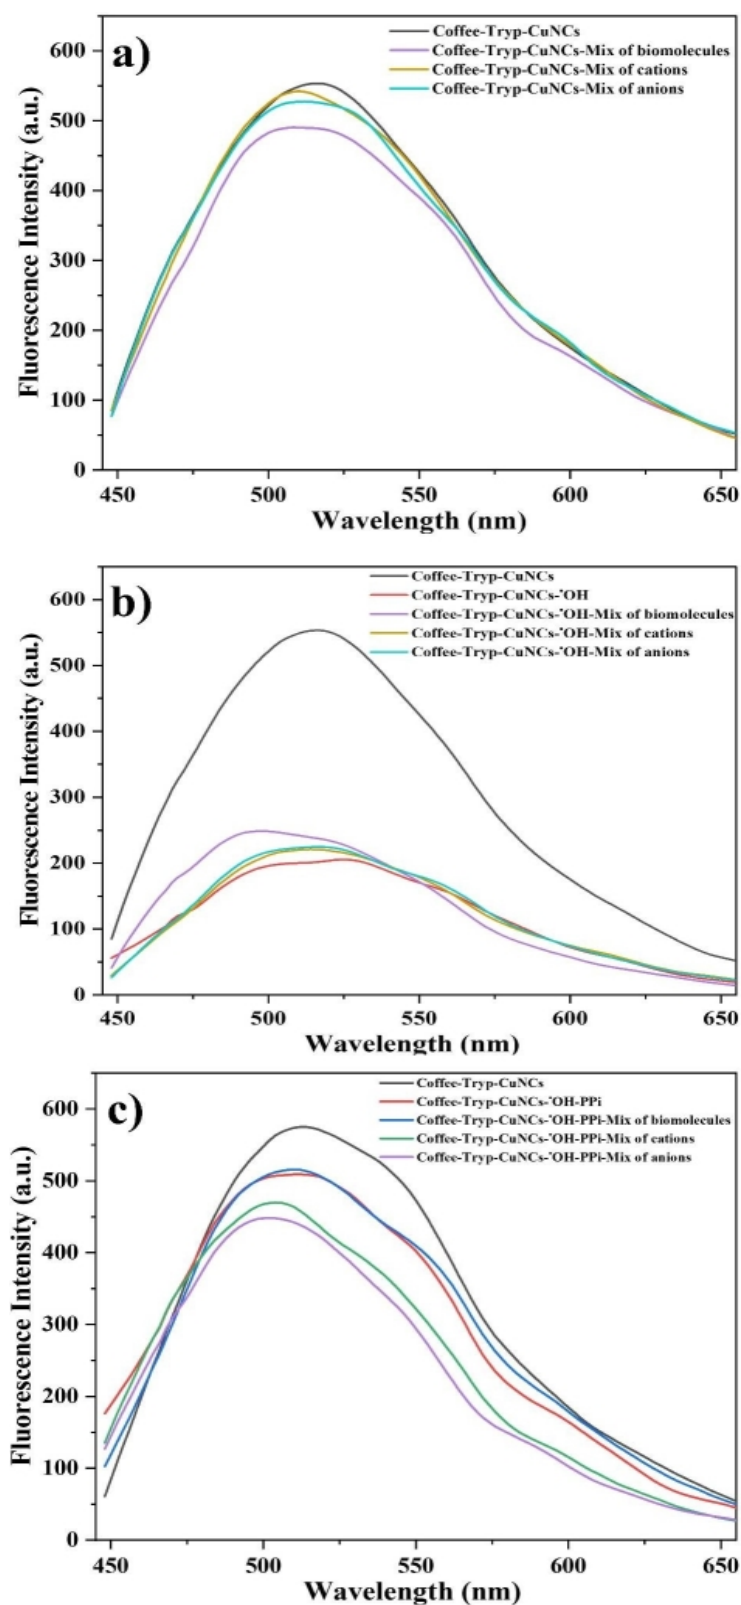

**Figure S17** (a) Interference study of Coffee-Tryp-CuNCs with various biomolecules (cysteine, arginine, ALP, ATP, tryptophan and alanine), cations and anions and in presence of (b)  $\cdot\text{OH}$  (c) PPI.

**Table S1.** Analysis of  $\cdot\text{OH}$  in spiked tap and industrial waste water by using Coffee-Tryp-CuNCs as a probe (n=3)

| Analyte          | Sample                 | Added Concentration ( $\mu\text{M}$ ) | Found Concentration ( $\mu\text{M}$ ) | Recovery (%) | RSD (%) (n=3) |
|------------------|------------------------|---------------------------------------|---------------------------------------|--------------|---------------|
| $\cdot\text{OH}$ | Tap water              | 10                                    | 9.84                                  | 98.43        | 1.16          |
|                  |                        | 25                                    | 24.77                                 | 99.08        | 1.35          |
|                  |                        | 50                                    | 49.00                                 | 98.01        | 0.38          |
|                  | Industrial waste water | 10                                    | 9.77                                  | 97.78        | 1.28          |
|                  |                        | 25                                    | 24.73                                 | 98.94        | 1.74          |
|                  |                        | 50                                    | 49.30                                 | 98.61        | 1.17          |
